# Supplementary material for: Mesophilic Argonaute-based isothermal detection of SARS-CoV-2
Source: PubMed Central journal article supplement (PMC9363790; doi:10.3389/fmicb.2022.957977), 2022-07-27
Supplement: Data_Sheet_1.pdf [file Data_Sheet_1.pdf]

## *Supplementary Material*

### Supplementary Tables

**Supplementary Table 1** The nucleotide sequences used in this research.

| Single-stranded nucleic acids | Sequences (5'-3')                                                                                                                                                                                                                                   |
|-------------------------------|-----------------------------------------------------------------------------------------------------------------------------------------------------------------------------------------------------------------------------------------------------|
| SARS-CoV-2 1b 76 nt ssDNA     | TGTGTGGCGGTTCACTATATGTTAAACCAGGTGG<br>AACCTCATCAGGAGATGCCACAACCTGCTTATGCT<br>AATAGTGT                                                                                                                                                               |
| primary gDNA RT Guide A       | P-GCAGTTGTGGCATCTCCTG                                                                                                                                                                                                                               |
| primary gDNA RT Guide B       | P-CTGATGAGGTTCCACCTGG                                                                                                                                                                                                                               |
| Fluorescent Reporter          | FAM-GCGACTTGACATCTCCTGATGAGGTGTGC-<br>BHQ1                                                                                                                                                                                                          |
| ssDNA target                  | ATATACTATAACAACCTACTACCTCGTATAAATTTT<br>TAAATAAATA-FAM                                                                                                                                                                                              |
| ssRNA target                  | AUAUACUAUACAACCUACUACCUCGUAAUAAA<br>UUUAAAUAUAAAUA-FAM                                                                                                                                                                                              |
| 5'P DNA guide                 | P-TGAGGTAGTAGGTTGTATAGT                                                                                                                                                                                                                             |
| 5'OH DNA guide                | HO-TGAGGTAGTAGGTTGTATAGT                                                                                                                                                                                                                            |
| 5'P RNA guide                 | P-UGAGGUAGUAGGUUGUAUAGU                                                                                                                                                                                                                             |
| 5'OH RNA guide                | HO-UGAGGUAGUAGGUUGUAUAGU                                                                                                                                                                                                                            |
| Inserted DNA fragment         | TAATACGACTCACTATAGGGGATAAAAGTGCATT<br>AACATTGGCCGTGACAGCTTGACAAATGTTAAAA<br>ACACTATTAGCATAAGCAGTTGTGGCATCTCCTG<br>ATGAGGTTCCACCTGGTTAACATATAGTGAACC<br>GCCACACATGACCATTTCACTCAATACTTGAGCA<br>CACTCATTAGCTAATCTATAGAAACGGTGTGACA<br>AGCTACAACACGTTGT |
| FW-1b-256 bp                  | CAGCTATGACCATGATTACGCCAAG                                                                                                                                                                                                                           |
| RV-1b-256 bp                  | GGGGATCCACAACGTGTTGTAGCTT<br>GGGGAUAAAAGUGCAUUAACAUUGGCCGUGACA<br>GCUUGACAAAUGUUAAAAACACUAUUAGCAUAA<br>GCAGUUGUGGCAUCUCCUGAUGAGGUUCCACCU                                                                                                            |
| RNA template                  | GGUUUAACAUAUAGUGAACCGCCACACAUGACC<br>AUUUCACUCAAUACUUGAGCACACUCAUUAGCU<br>AAUCUAUAGAAACGGUGUGACAAGCUACAACAC<br>GUUGUGGAUCCCC                                                                                                                        |
| RT primer                     | ACAACGTGTTGTAGC                                                                                                                                                                                                                                     |

**Supplementary Table 2** Comparison of reported CRISPR-based and thermophilic Ago-based methods for SARS-CoV-2 detection.

| Detection methods                        | Nuclease           | Operation                                                  | Target motif requirement | Guide oligos         | Specificity | Lid opening | Portable |
|------------------------------------------|--------------------|------------------------------------------------------------|--------------------------|----------------------|-------------|-------------|----------|
| DETECTR<br>(Broughton et al., 2020)      | <i>LbCas12a</i>    | 62 °C for 20-30 min; 37 °C for 10 min                      | PAM                      | 41 nt gRNAs          | High        | Yes         | Yes      |
| CRISPR-FDS<br>(Huang et al., 2020)       | <i>LbaCas12a</i>   | 42 °C for 20 min;<br>37 °C for 20 min                      | PAM                      | 41-43 nt<br>gRNAs    | Medium      | Yes         | No       |
| CRISPR/Cas12a-NER<br>(Wang et al., 2020) | <i>FnCas12a</i>    | 39 °C for 30 min;<br>37 °C for 15 min                      | PAM                      | 28 nt crRNAs         | High        | Yes         | Yes      |
| STOPCovid<br>(Joung et al., 2020)        | <i>AapCas12b</i>   | 60 °C for 1 h                                              | PAM                      | 111 nt crRNAs        | High        | No          | Yes      |
| CASdetec<br>(Guo et al., 2020)           | <i>AaCas12b</i>    | 42 °C for 30 min;<br>42 °C for 10-30 min                   | PAM                      | 103-105 nt<br>sgRNAs | High        | No          | Yes      |
| SHERLOCK<br>(Zhang et al., 2020)         | <i>LwaCas13a</i>   | 42°C for 25 min;<br>37°C for 30 min                        | PFS                      | 64 nt crRNAs         | High        | Yes         | Yes      |
| SARS-CoV-2 PAND<br>(Wang et al., 2021)   | <i>PfAgo</i>       | 55 °C for 10 min;<br>45 PCR cycles;<br>95 °C for 20-30 min | No                       | 16 nt gDNAs          | High        | Yes         | No       |
| MULAN<br>(Ye et al., 2022)               | <i>PfAgo</i>       | 65 °C for 30-40 min;<br>95 °C for 10-15 min                | No                       | 16 nt gDNAs          | High        | No          | Yes      |
| MAIDEN                                   | <i>PbAgo/KmAgo</i> | 42 °C for 1 h                                              | No                       | 19 nt gDNAs          | High        | No          | Yes      |

**Supplementary Figures**
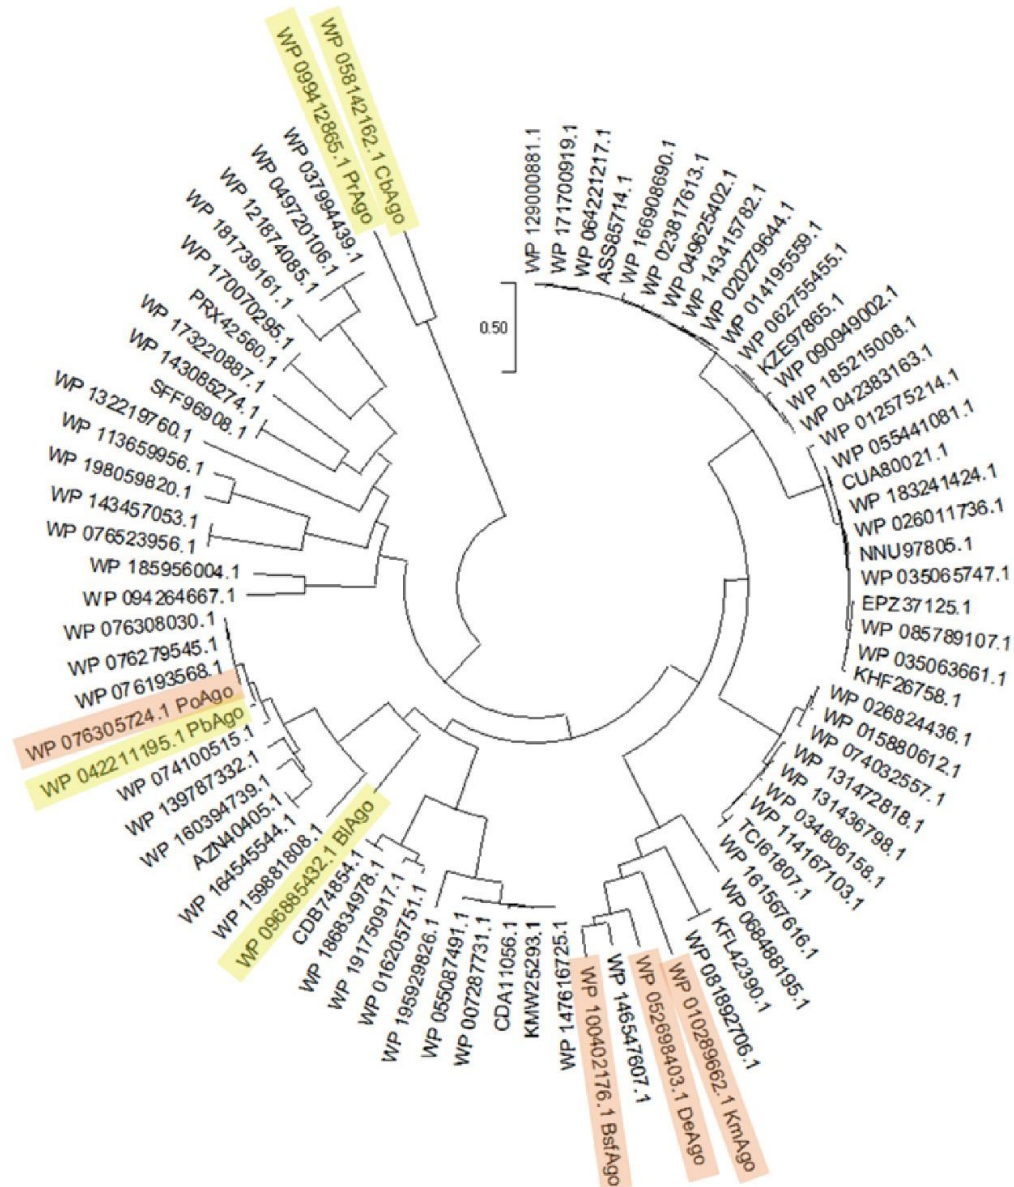

**Supplementary Figure 1.** Phylogenetic tree analysis based on the amino acid sequences of the characterized mesophilic Agos. Candidate Agos that target DNA are highlighted in yellow. Candidates for universal Ago are highlighted in orange. Ago from *Brevibacillus laterosporus* (BlAgo, WP\_096885432.1); Ago from *Clostridium butyricum* (CbAgo, WP\_058142162.1); Ago from *Paenibacillus borealis* (PbAgo, WP\_042211195.1); Ago from *Pseudobutyrvibrio ruminis* (PrAgo, WP\_099412865.1); Ago from *Kurthia massiliensis* (KmAgo, WP\_010289662.1); Ago from *Domibacillus enclensis* (DeAgo, WP\_052698403.1); Ago from *Bacillus sp. FJAT-42315* (BsfAgo, WP\_100402176.1); Ago from *Paenibacillus odorifer* (PoAgo, WP\_076305724.1).

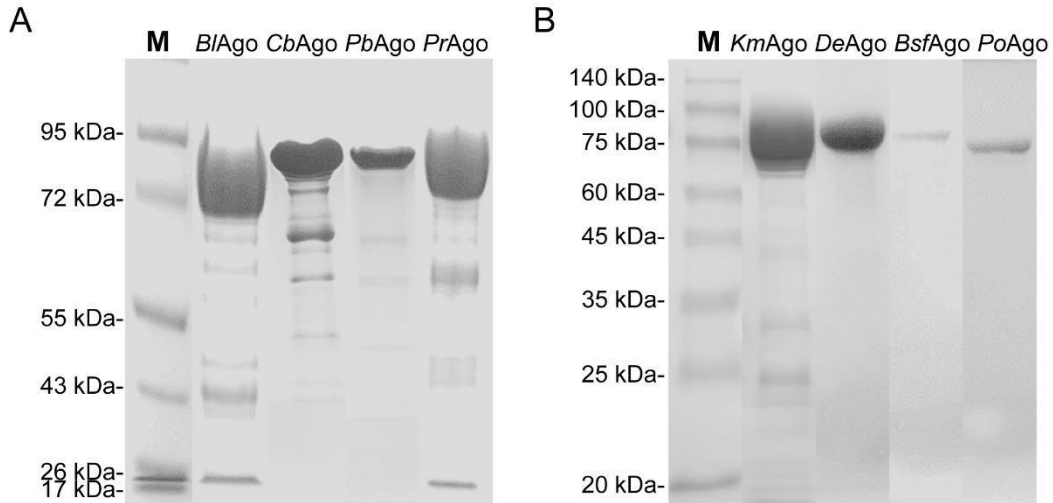

**Supplementary Figure 2.** SDS-PAGE analysis of purified Agos. (A) Candidate Agos that target DNA: *BlAgo*, *CbAgo*, *PbAgo*, *PrAgo*. (B) Candidates for universal Ago: *KmAgo*, *DeAgo*, *BsfAgo*, *PoAgo*.

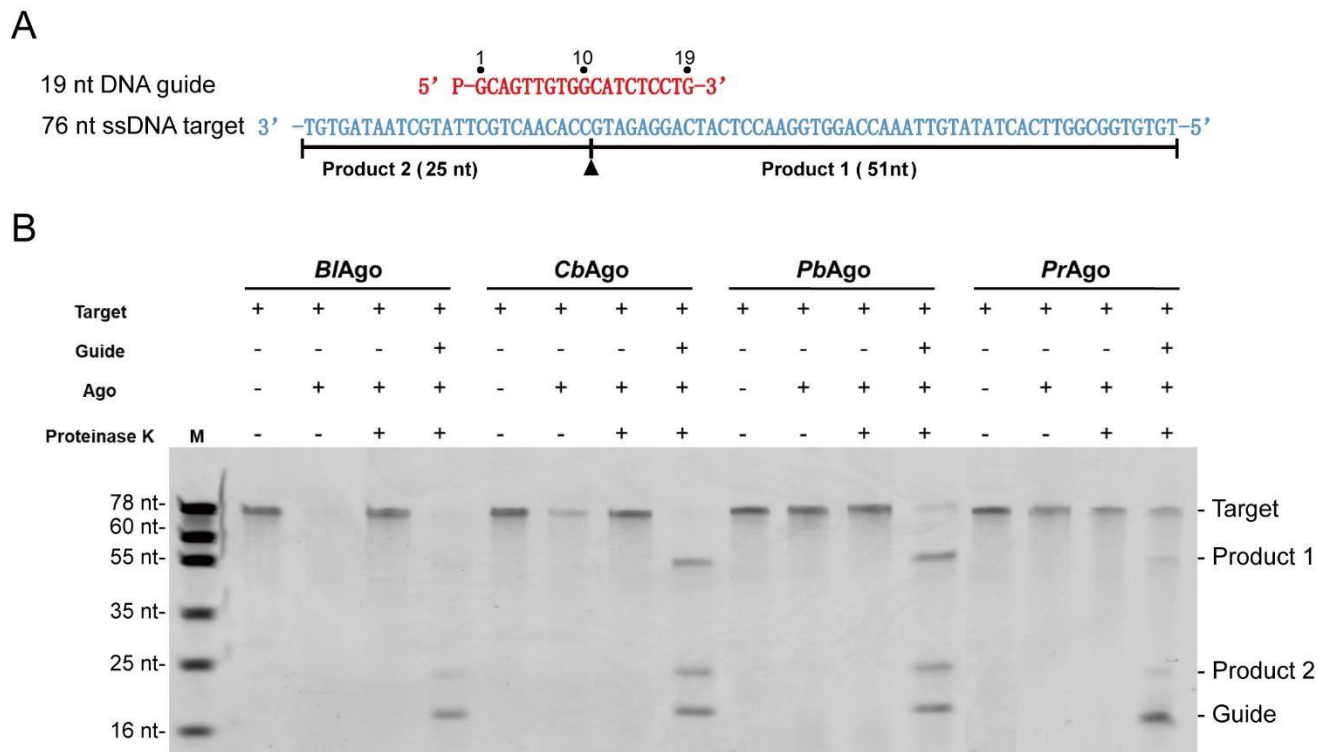

**Supplementary Figure 3.** *In vitro* cleavage activity determination of *BlAgo*, *CbAgo*, *PbAgo* and *PrAgo*. (A) Synthetic 5'P gDNA and ssDNA targets sequence. (B) The gel electrophoresis result of the Ago cleavage experiment.

A

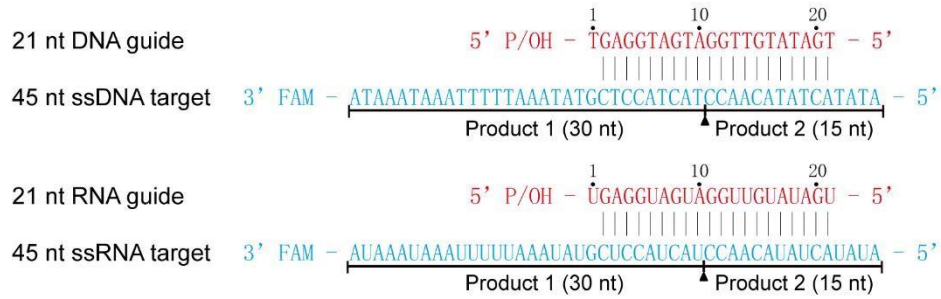

B

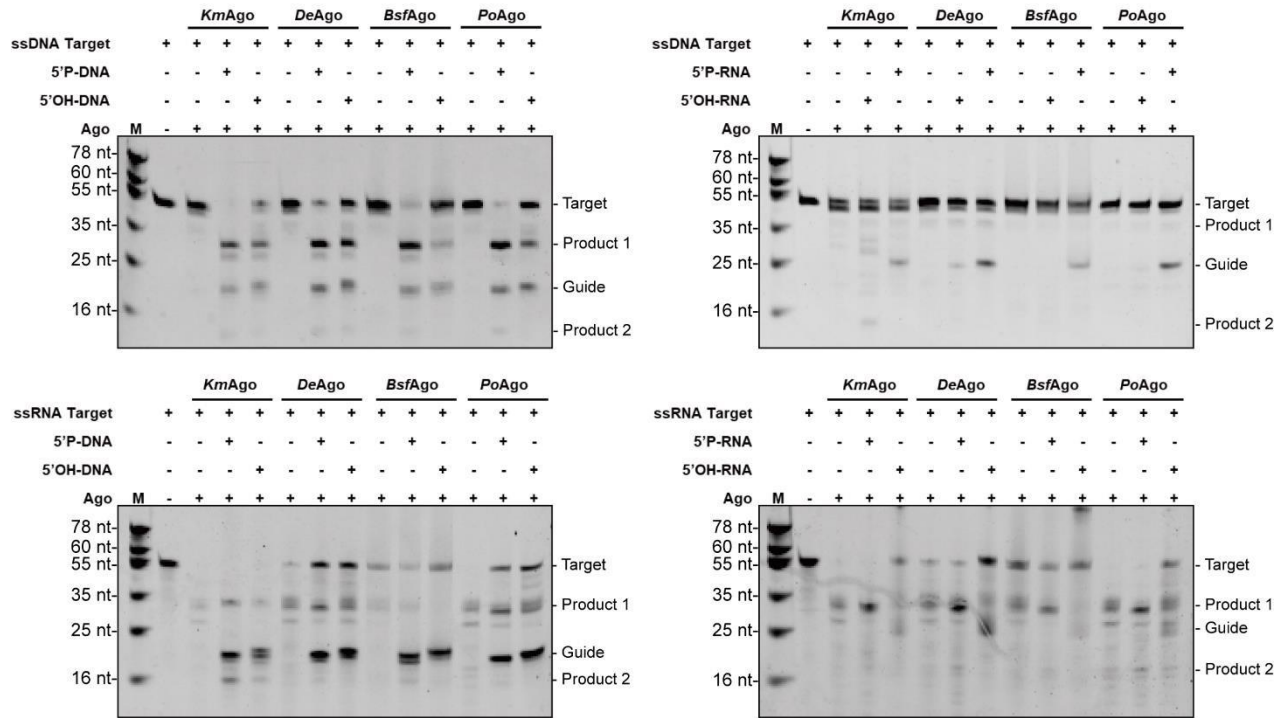

**Supplementary Figure 4.** *In vitro* cleavage activity determination of *KmAgo*, *DeAgo*, *BsfAgo* and *PoAgo*. (A) Synthetic 5'P and 5'OH gDNA, gRNA and ssDNA, RNA targets sequence. (B-E) The gel electrophoresis result of the Ago cleavage experiment: (B) DNA-guided cleavage of DNA target; (C) RNA-guided cleavage of DNA target; (D) DNA-guided cleavage of RNA target; (E) RNA-guided cleavage of RNA target.

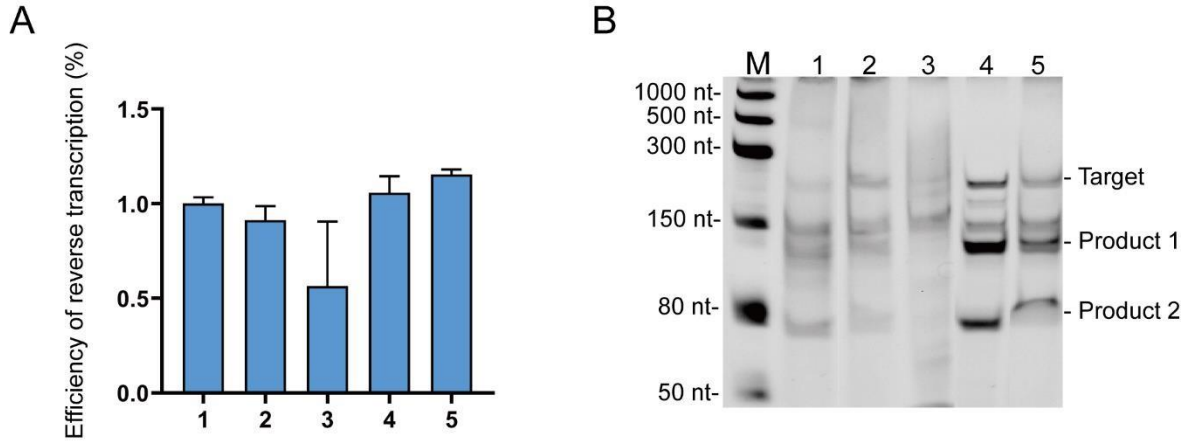

**Supplementary Figure 5.** Screening of enzymes for reverse transcription. (A) Transcription efficiency of the five reverse transcriptases. Error bars, standard deviation (SD) of replicates ( $n = 3$ ). (B) Cleavage efficiency of *PbAgo* in five reverse transcription systems.

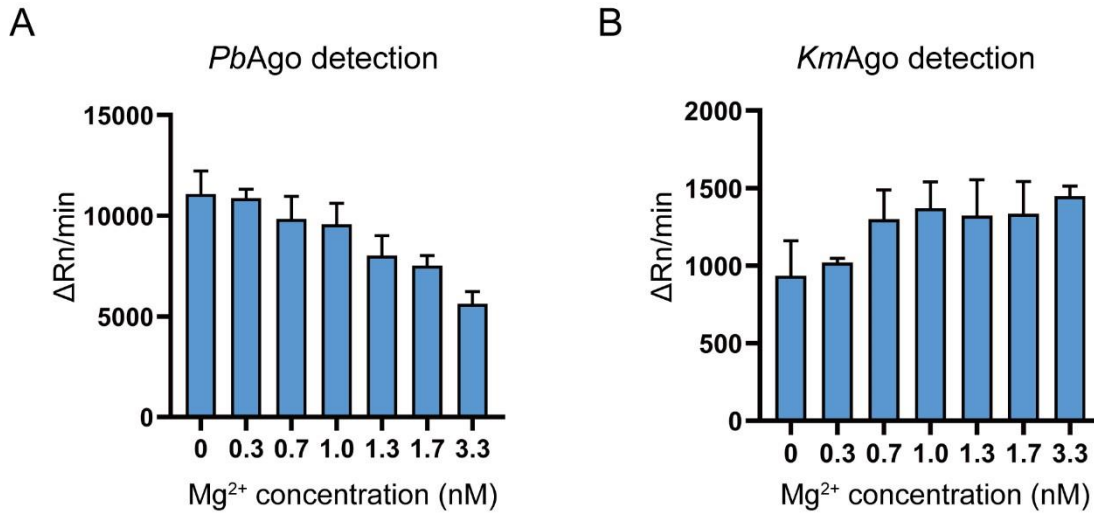

**Supplementary Figure 6.** Optimization of an isothermal detection reaction of mesophilic Agos. (A) Fluorescence values of *PbAgo* cascade cleavage under different concentrations of Mg<sup>2+</sup>. (B) Fluorescence values of *KmAgo* cascade cleavage under different concentrations of Mg<sup>2+</sup>. Data were collected from three independent experiments and are presented as the Mean  $\pm$  SD.

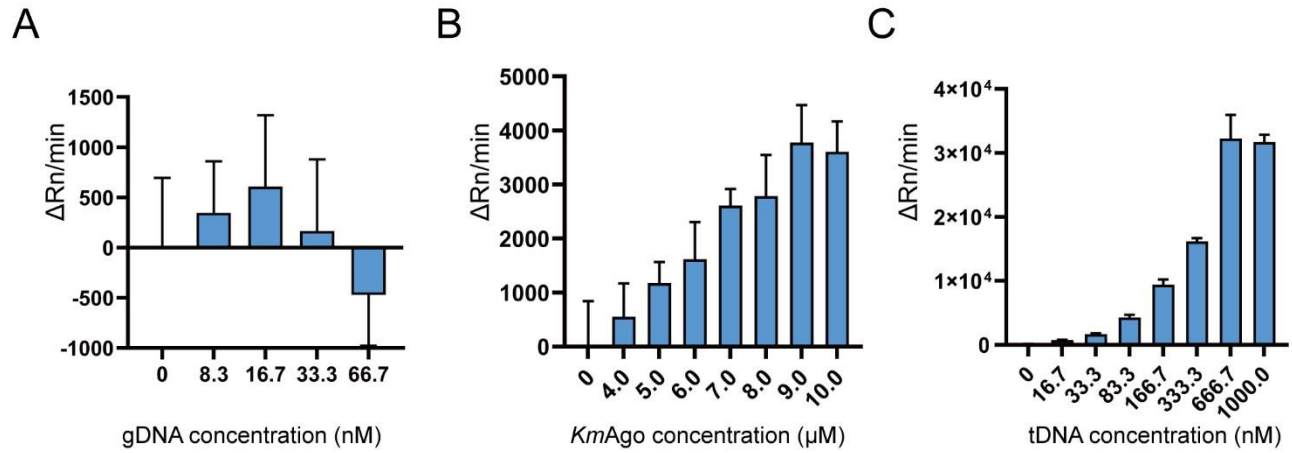

**Supplementary Figure 7.** Optimization of an isothermal detection reaction of *KmAgo*. (A-C) Fluorescence values of *KmAgo* cascade cleavage under different concentrations of gDNA (A), *KmAgo* (B), and tDNA (C). Data were collected from three independent experiments and are presented as the Mean ± SD.

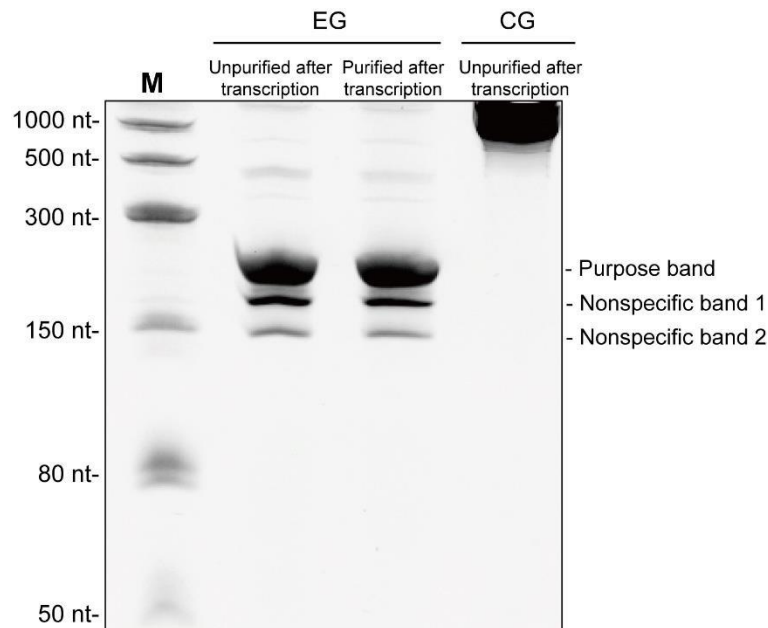

**Supplementary Figure 8.** The gel electrophoresis result of transcribed RNA. EG, experimental group, including unpurified and purified 200bp RNA template after transcription. CG, control group, unpurified RNA fragment transcribed from the DNA template that comes with the transcription kit.

## Supplementary References

- Broughton, J.P., Deng, X., Yu, G., Fasching, C.L., Servellita, V., Singh, J., et al. (2020). CRISPRCas12-based detection of SARS-CoV-2. *Nat. Biotechnol.* 38(7), 870-874. doi: 10.1038/s41587020-0513-4.
- Guo, L., Sun, X., Wang, X., Liang, C., Jiang, H., Gao, Q., et al. (2020). SARS-CoV-2 detection with CRISPR diagnostics. *Cell Discov.* 6, 34. doi: 10.1038/s41421-020-0174-y.
- Huang, Z., Tian, D., Liu, Y., Lin, Z., Lyon, C.J., Lai, W., et al. (2020). Ultra-sensitive and highthroughput CRISPR-powered COVID-19 diagnosis. *Biosens. Bioelectron.* 164, 112316. doi: 10.1016/j.bios.2020.112316.
- Joung, J., Ladha, A., Saito, M., Segel, M., Bruneau, R., Huang, M.W., et al. (2020). Point-of-care testing for COVID-19 using SHERLOCK diagnostics. *medRxiv*. doi: 10.1101/2020.05.04.20091231.
- Wang, F., Yang, J., He, R., Yu, X., Chen, S., Liu, Y., et al. (2021). PfAgo-based detection of SARSCoV-2. *Biosens. Bioelectron.* 177, 112932. doi: 10.1016/j.bios.2020.112932.
- Wang, X., Zhong, M., Liu, Y., Ma, P., Dang, L., Meng, Q., et al. (2020). Rapid and sensitive detection of COVID-19 using CRISPR/Cas12a-based detection with naked eye readout, CRISPR/Cas12a-NER. *Sci. Bull. (Beijing)* 65(17), 1436-1439. doi: 10.1016/j.scib.2020.04.041.
- Ye, X., Zhou, H., Guo, X., Liu, D., Li, Z., Sun, J., et al. (2022). Argonaute-integrated isothermal amplification for rapid, portable, multiplex detection of SARS-CoV-2 and influenza viruses. *Biosens. Bioelectron.* 207, 114169. doi: 10.1016/j.bios.2022.114169.
- Zhang, F., Abudayyeh, O.O., and Gootenberg, J.S. (2020). A protocol for detection of COVID-19 using CRISPR diagnostics. *Broad Institute* 8.
